# Supplementary material for: Surfactant stabilization of vanadium iron oxide derived from Prussian blue analog for lithium-ion battery electrodes
Source: Royal Society of Chemistry journal article supplement (doi:10.1039/d3se00854a), 2023-01-01
Supplement: d3se00854a1.pdf [file d3se00854a1.pdf]

## Supporting Information

### **Surfactant stabilization of vanadium iron oxide derived from Prussian blue analog for lithium-ion battery electrodes**

Behnoosh Bornamehr<sup>1,2</sup>, Hiba El Gaidi<sup>1,2</sup>,  
Stefanie Arnold<sup>1,2</sup>, Emmanuel Pameté<sup>1</sup>, Volker Presser<sup>1,2,3,\*</sup>

<sup>1</sup> *INM – Leibniz Institute for New Materials, Campus D2 2, 66123, Saarbrücken, Germany*

<sup>2</sup> *Department of Materials Science & Engineering, Saarland University, Campus D2 2, 66123, Saarbrücken, Germany*

<sup>3</sup> *Saarene – Saarland Center for Energy Materials and Sustainability, Campus C4 2, 66123 Saarbrücken, Germany*

\* Corresponding author: [volker.presser@leibniz-inm.de](mailto:volker.presser@leibniz-inm.de) (VP)

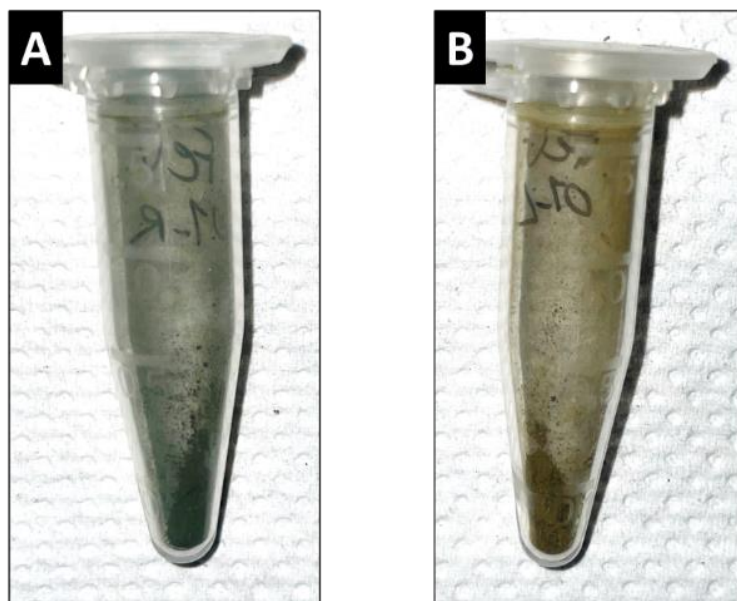

**Figure S1.** Photographs of FeV oxidation under synthetic air resulting in inhomogeneous oxide formation at **A** low stream and **B** upstream of the furnace.

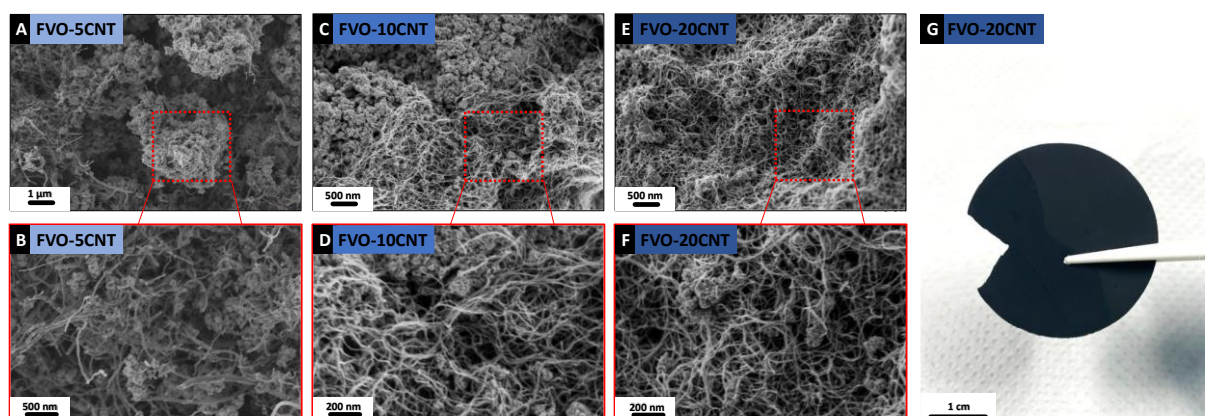

**Figure S2.** **A-F** Scanning electron micrographs of FVO mixed with different mass ratios (5, 10, 20 mass%) of CNT. **G** Photograph of the filtrated self-standing FVO on CNTs used for cutting the electrodes.

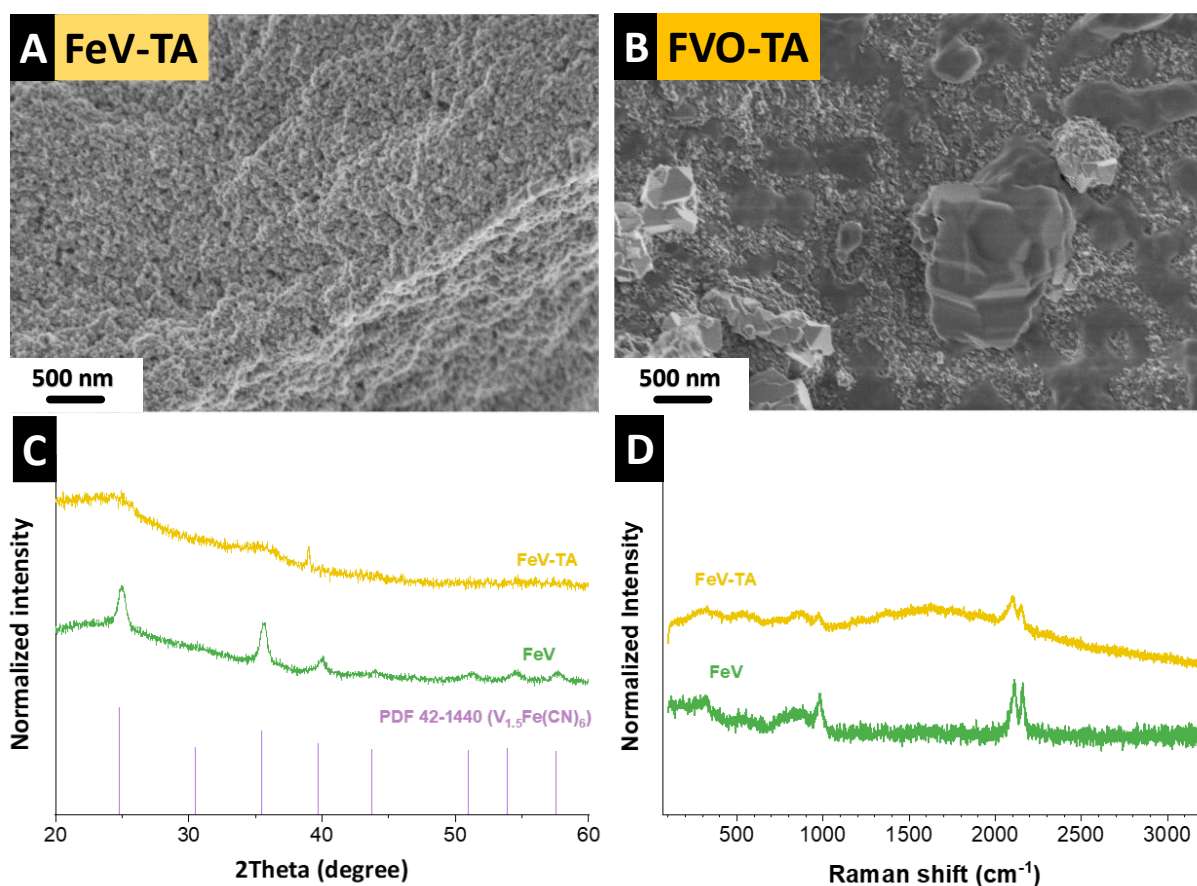

**Figure S3.** Scanning electron micrographs of **A** FeV synthesized with tannic acid and **B** its resulting oxide. **C** Respective X-ray diffractograms and **D** Raman spectra.

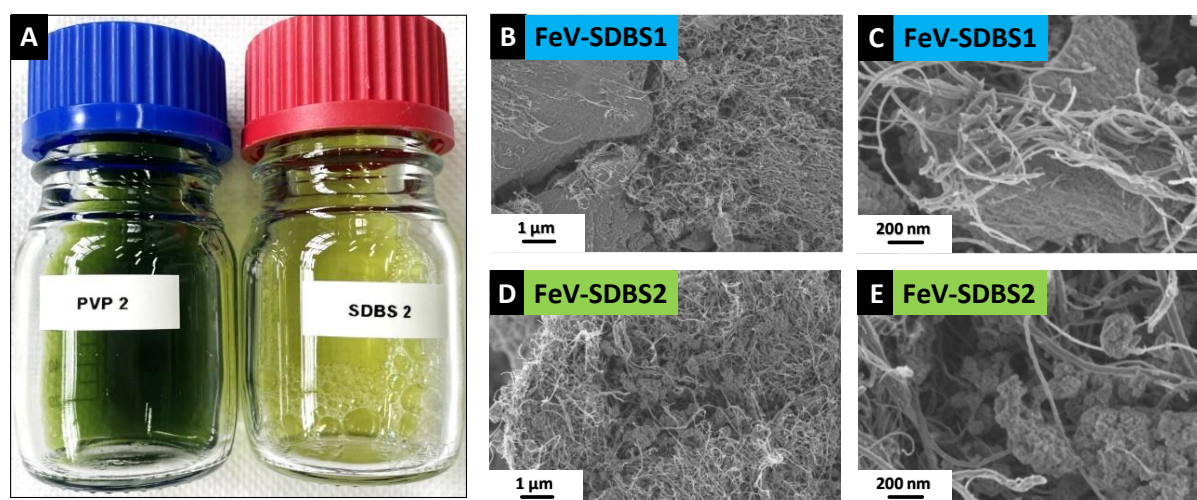

**Figure S4.** **A** Photograph of the residual supernatants after centrifugation of PVP and SDBS containing synthesis solutions. **B-C** Scanning electron micrographs of FeV-SDBS1 and **D-E** of FeV-SDBS2.

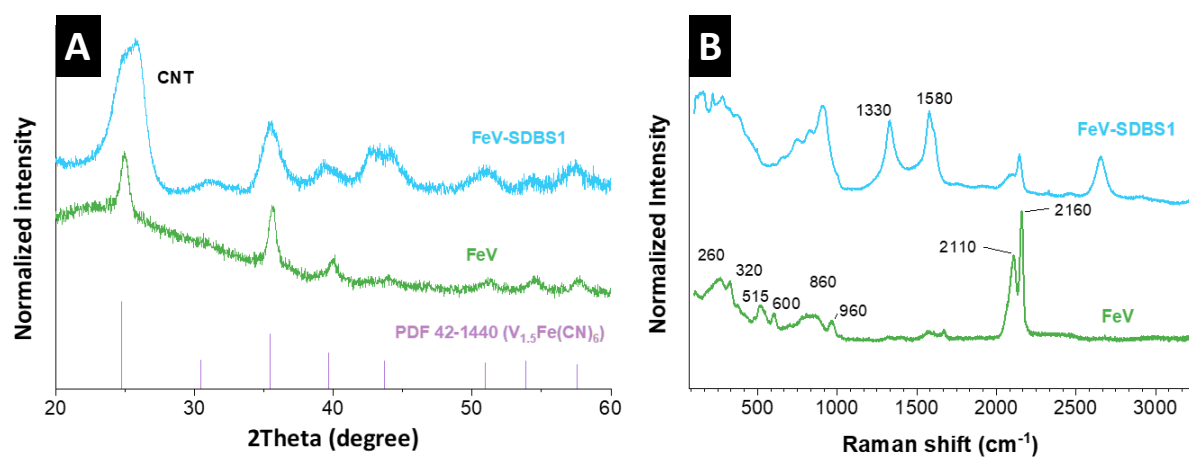

**Figure S5. A** X-ray diffractograms and **B** Raman spectrum of FeV-SDBS1 compared to the FeV.

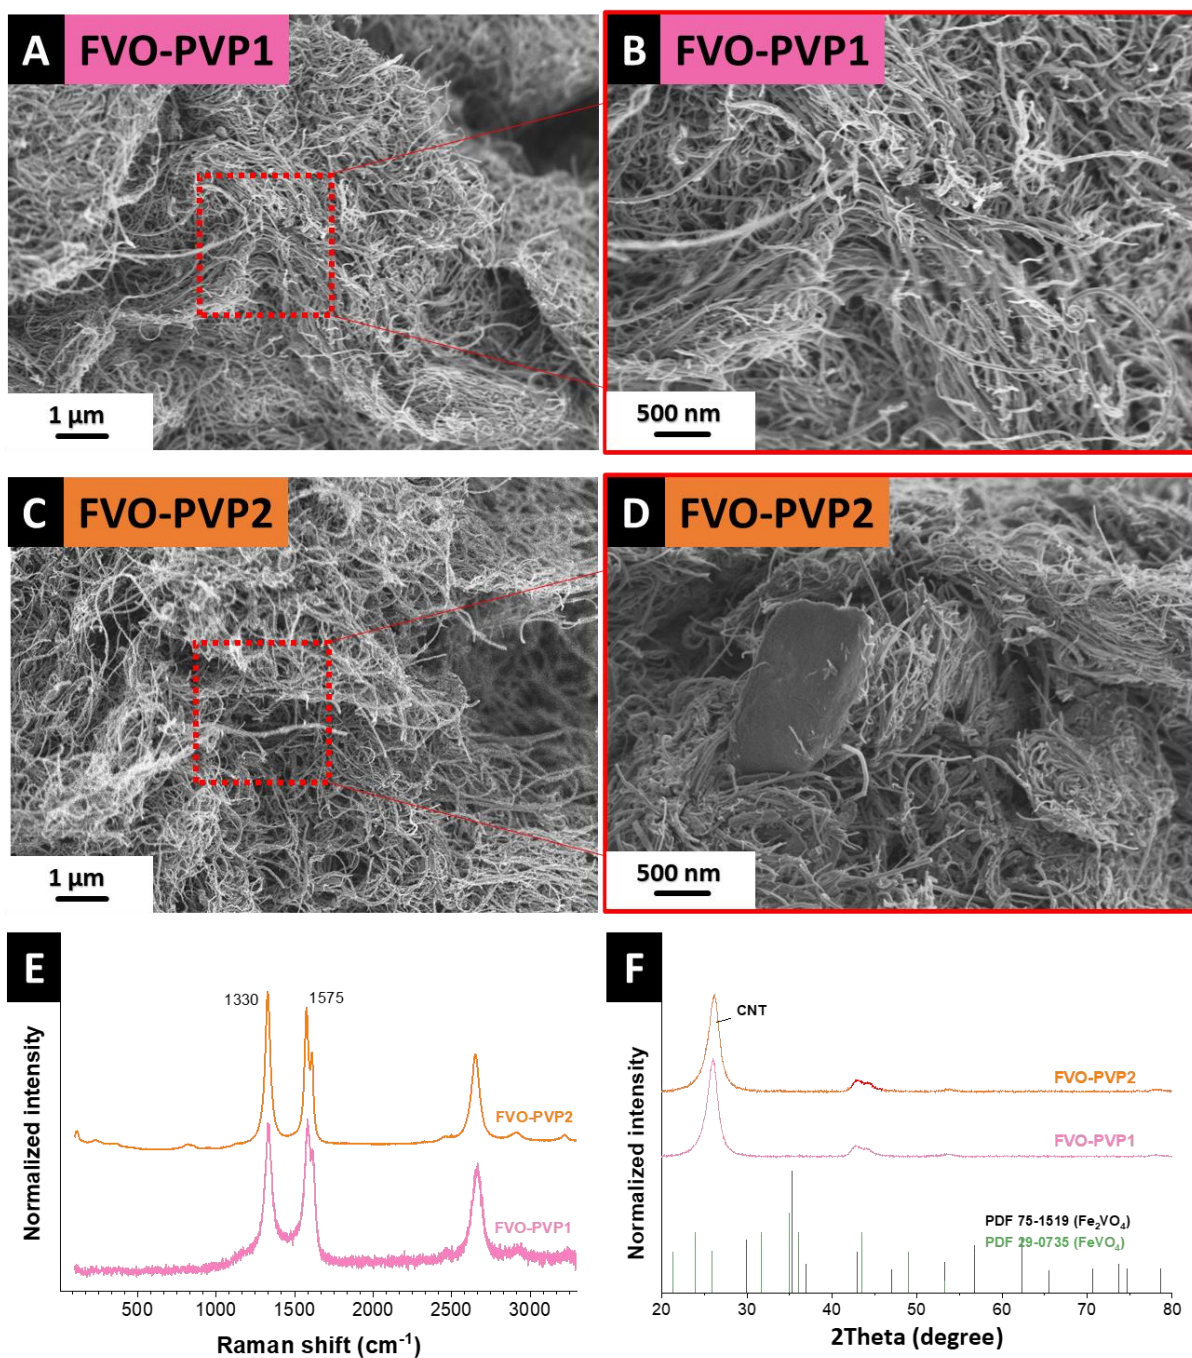

**Figure S6.** Scanning electron micrographs of **A-B** FeV-PVP1 and **C-D** FeV-PVP2 and their respective **E** Raman spectra and **F** X-ray diffractograms.

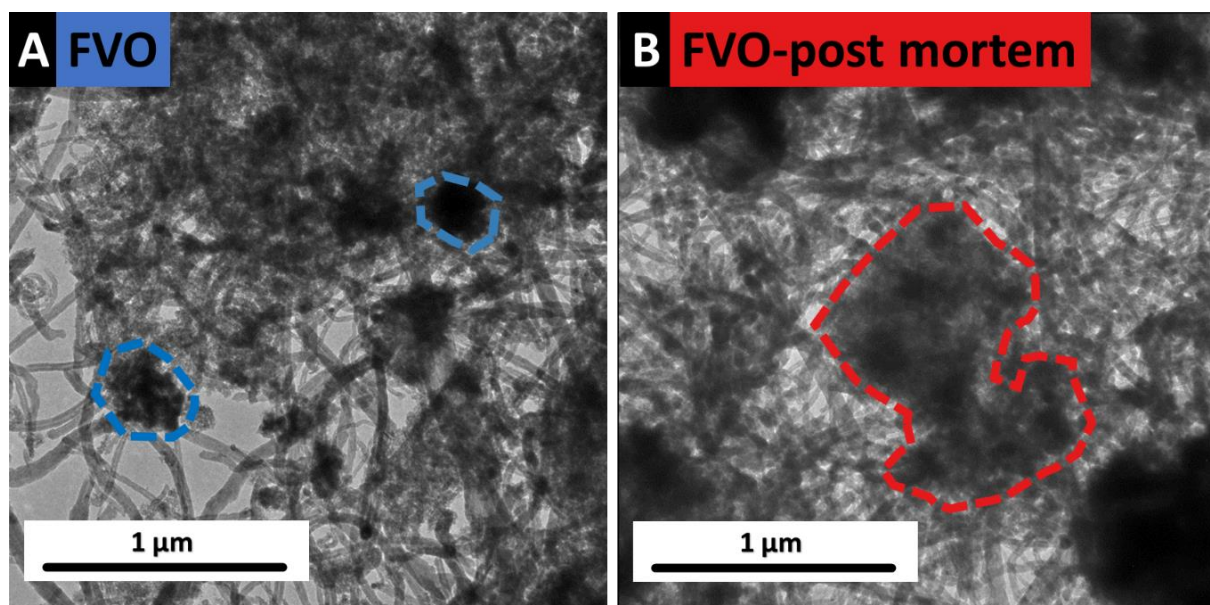

**Figure S7.** Transmission electron micrographs of the FVO electrode **A** before and **B** after cycling.

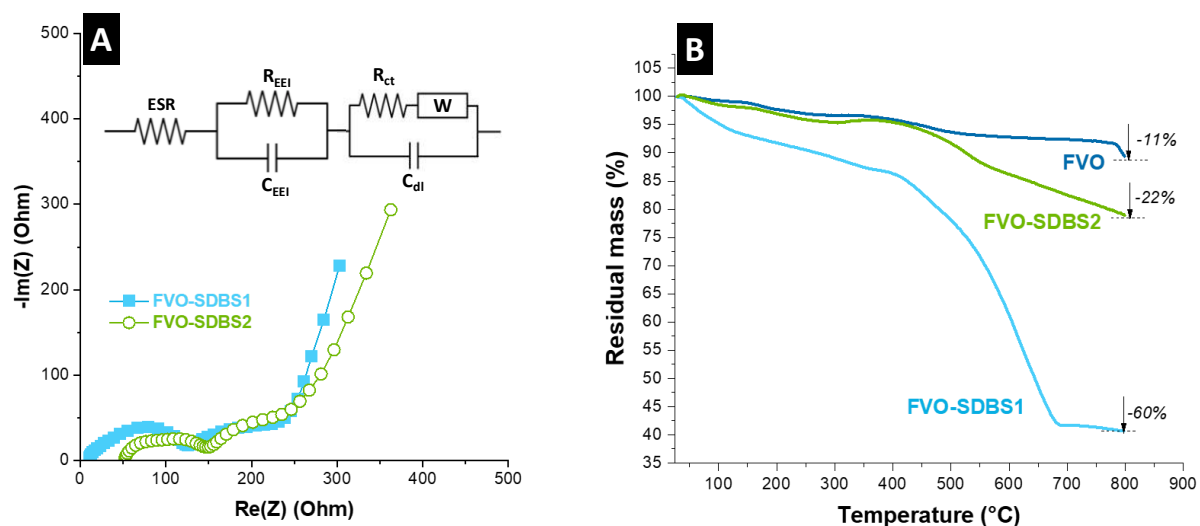

**Figure S8.** **A** Nyquist plot of FVO-SDBS1 and FVO-SDBS2. The inset shows the corresponding EIS equivalent circuit. **B** TGA curves of FVO, FVO-SDBS1, and FVO-SDBS2 under Ar.

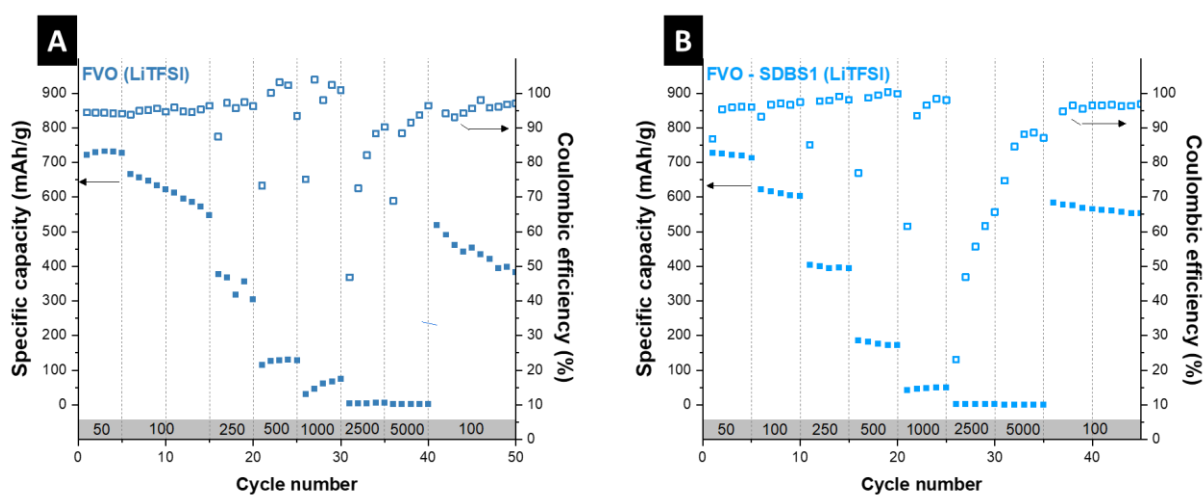

**Figure S9.** Galvanostatic charge/discharge cycling at 50-5000 mA/g for **A** FVO and **B** FVO-SDBS1.

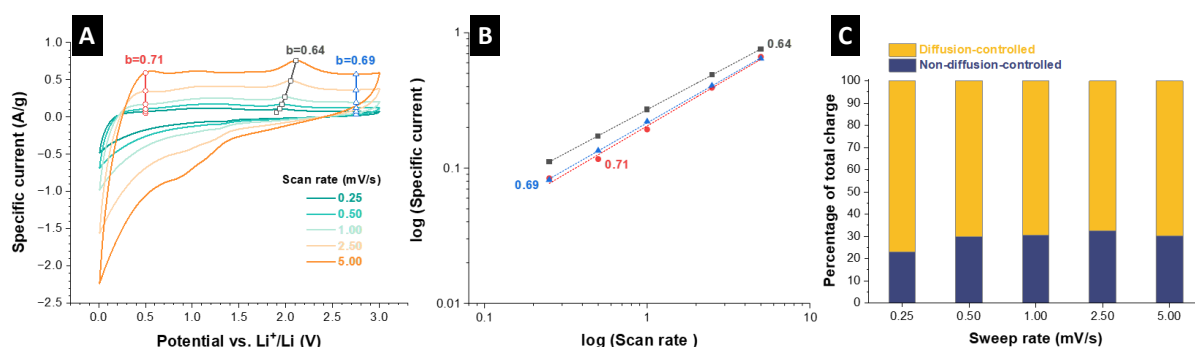

**Figure S10.** Cyclic voltammetry of FVO-SDBS1 at scan rates of 0.25-5.00 mV/s with their respective b-values at different potentials. **B** Specific current vs. scan rate at the maximum potential of each cycle, as well as potentials 0.5 V vs.  $\text{Li}/\text{Li}^+$  and 2.75 V vs.  $\text{Li}/\text{Li}^+$ . **C** Calculated charge storage percentage from diffusion-controlled and non-diffusion-controlled charge from  $k_1$  and  $k_2$  values at different scan rates.

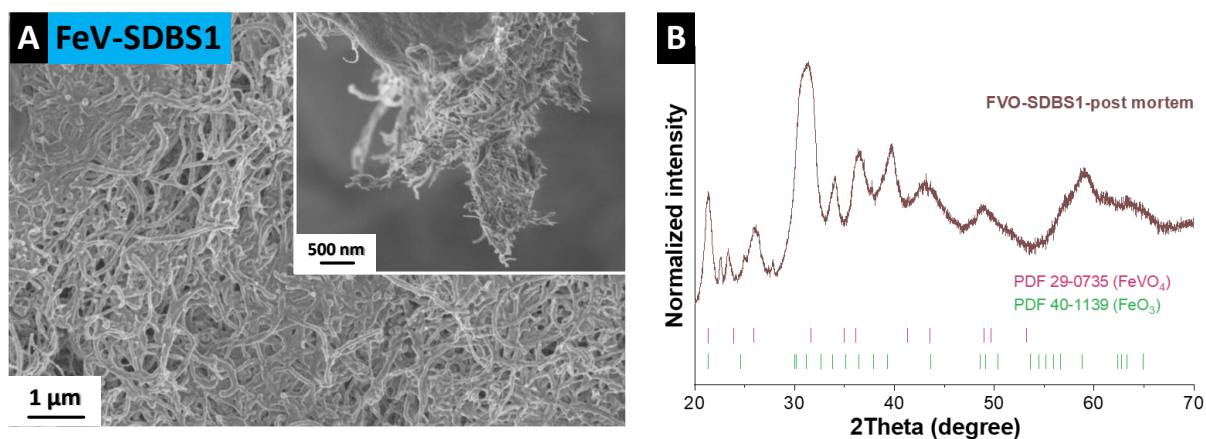

**Figure S11.** Post-mortem analysis of FVO-SDBS1. **A** Scanning electron micrograph of the electrode surface and **B** X-ray diffractogram of the electrode.

**Table S1.** Equivalent series resistance (ESR), the resistance of the electrode-electrolyte interphase ( $R_{EEI}$ ), charge transfer resistance ( $R_{ct}$ ), and Warburg resistance ( $R_w$ ) of the tested cells.

| Materials | ESR ( $\Omega$ ) | $R_{EEI}$ ( $\Omega$ ) | $R_{ct}$ ( $\Omega$ ) | $R_w$ ( $\Omega$ ) |
|-----------|------------------|------------------------|-----------------------|--------------------|
| FVO-SDBS1 | 10.8             | 66.1                   | 177.5                 | 219.8              |
| FVO-SDBS2 | 52.3             | 103.2                  | 207.6                 | 227.7              |
